# Supplementary material
Source: publisher figshare collection journal article supplement (https://geolsoc.figshare.com/articles/dataset/_/3453155)
Supplement: Supplementary file 1 [file 1]

List of Tables (see Supplementary Publication on the online version)

Table 1. Results of U-Th-Pb LA-ICP-MS analyses of zircons from the Karadağ paragneiss (carried out at Frankfurt, Germany).

Table 2. Results of U-Th-Pb LA-ICP-MS analyses of zircons from the Narlık schist (carried out at Frankfurt, Germany).

Table 3. Results of U-Th-Pb LA-ICP-MS analyses of zircons from the Çamlıkaya granite and crosscutting dykes (carried out at Frankfurt, Germany).

Table 4. Results of U-Th-Pb LA-ICP-MS analyses of zircons from a granitic vein (carried out at Frankfurt, Germany).

Table 5. Results of U-Th-Pb LA-ICP-MS analyses of zircons from the Narlık granite (carried out at Sofia, Bulgaria).

Table 6. Results of U-Th-Pb LA-ICP-MS analyses (Frankfurt) of zircons from the metagranitic intrusion in the Karadağ paragneiss (carried out at Frankfurt, Germany).

Table 7. Results of U-Th-Pb Ion Probe analyses of zircons from the Kölik granite (carried out at Edinburgh, UK).

Table 8. Results of U-Th-Pb LA-ICP-MS analyses (Sofia) of zircons from the Sinevrat granite (carried out at Sofia, Bulgaria).
